# Supplementary material for: Stress-Induced Activation of Heterochromatic Transcription
Source: PubMed Central journal article supplement (PMC2965753; doi:10.1371/journal.pgen.1001175), 2010-10-28
Supplement: pgen.1001175.s002.pdf [file pgen.1001175.s002.pdf]

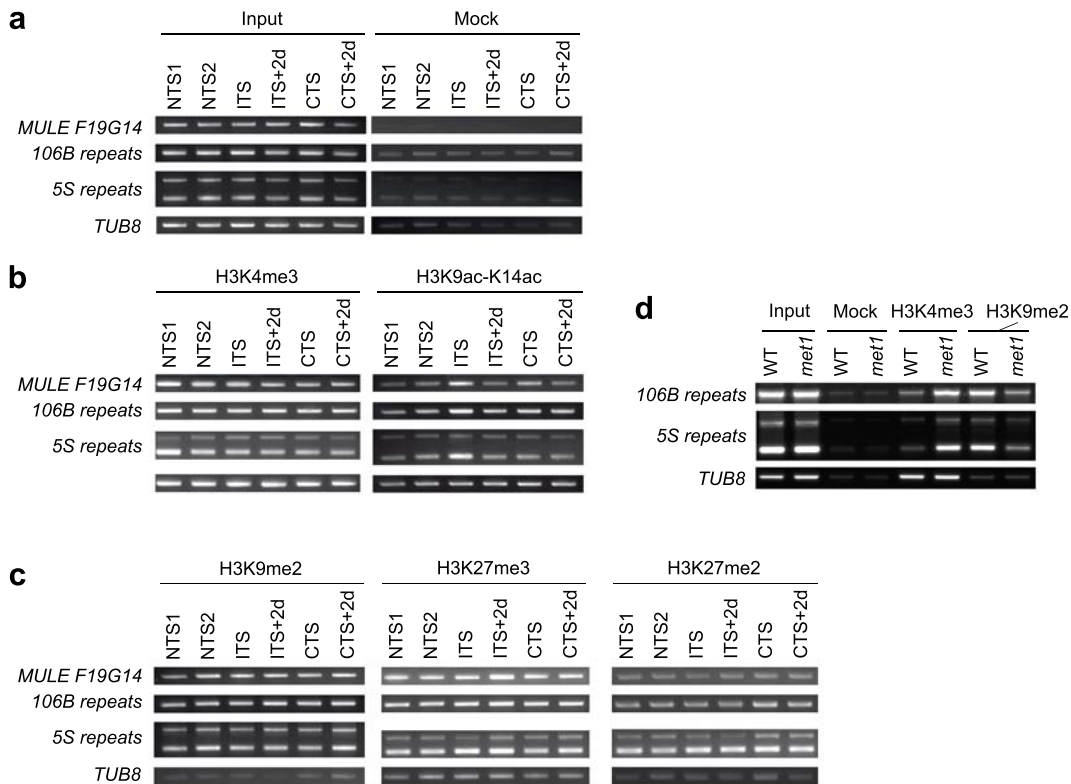

Supplementary Figure 2
