# Supplementary material for: Stress-Induced Activation of Heterochromatic Transcription
Source: PubMed Central journal article supplement (PMC2965753; doi:10.1371/journal.pgen.1001175), 2010-10-28
Supplement: pgen.1001175.s003.pdf [file pgen.1001175.s003.pdf]

**a**

| Locus                               | ITS vs. CTS ( $\log_2$ ) |
|-------------------------------------|--------------------------|
| AT2G15810<br>( <i>MULE-F19G14</i> ) | 5.6                      |
| AT2G36490<br>( <i>ROS1</i> )        | -1.6                     |
| AT3G10010<br>( <i>DML2</i> )        | -1.4                     |
| AT2G17690<br>( <i>SDC</i> )         | 1.2                      |

**b**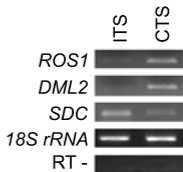**Figure S3**
