# Supplementary material for: Stress-Induced Activation of Heterochromatic Transcription
Source: PLoS Genet. 2010 Oct 28;6(10):e1001175. doi: 10.1371/journal.pgen.1001175 (PMC2965753; doi:10.1371/journal.pgen.1001175)
Supplement: Table S4 — List of transposable elements significantly upregulated (greater than fourfold, P<0.01) in ITS versus CTS. Transposons for which transcripts still over-accumulate in ITS+2d compared with CTS+2d, are listed at the end of the Table. (0.11 MB XLS) [file pgen.1001175.s008.xls]

## Sheet: Feuil1
Table S4.
TE ID	Alias	Super Family	ITS vs CTS (log2)	p value ITS vs CTS
AT1TE10935	ATCOPIA78	LTR/Copia	8.28484	2.1114e-06
AT1TE12295	ATCOPIA78	LTR/Copia	7.41476	1.20822e-05
AT3TE59080	ATCOPIA78	LTR/Copia	7.08767	0.000235172
AT3TE54550	ATCOPIA78	LTR/Copia	6.07312	1.67101e-05
AT4TE42010	ATCOPIA78	LTR/Copia	5.79807	0.000252479
AT3TE59075	ATCOPIA78	LTR/Copia	2.52457	0.000852069
AT3TE51900	ATCOPIA28	LTR/Copia	7.39207	6.364e-06
AT5TE41315	ATCOPIA28	LTR/Copia	5.84048	8.66483e-06
AT2TE11750	ATCOPIA28	LTR/Copia	4.33735	4.99807e-06
AT1TE43225	ROMANIAT5	LTR/Copia	7.23399	1.07746e-08
AT1TE51360	ROMANIAT5	LTR/Copia	7.15901	1.02776e-06
AT1TE41735	ROMANIAT5	LTR/Copia	7.10725	6.80922e-06
AT3TE51895	ROMANIAT5	LTR/Copia	6.64516	4.12438e-07
AT3TE61715	ROMANIAT5	LTR/Copia	5.74761	7.57452e-06
AT5TE41320	ROMANIAT5	LTR/Copia	4.6605	1.3616e-05
AT5TE41385	ROMANIAT5	LTR/Copia	4.41152	6.34463e-05
AT5TE39685	ROMANIAT5	LTR/Copia	3.97304	0.00012294
AT3TE62500	ROMANIAT5	LTR/Copia	3.68624	2.87659e-05
AT4TE20510	ROMANIAT5	LTR/Copia	3.57188	2.34454e-05
AT5TE41245	ROMANIAT5	LTR/Copia	3.29904	0.000195935
AT2TE11735	ROMANIAT5	LTR/Copia	2.42645	0.000765556
AT1TE43220	META1	LTR/Copia	7.20433	0.000814156
AT3TE48415	META1	LTR/Copia	2.92537	0.00376287
AT3TE48420	META1	LTR/Copia	2.09519	0.00108954
AT2TE14970	ATCOPIA85	LTR/Copia	5.82447	0.000854301
AT3TE62495	ATCOPIA27	LTR/Copia	5.45157	3.55445e-06
AT2TE14680	ATCOPIA7	LTR/Copia	5.05988	0.00164405
AT3TE30910	ATCOPIA57	LTR/Copia	4.93459	0.000548683
AT2TE14285	ATCOPIA8A	LTR/Copia	4.74805	3.52046e-06
AT1TE51350	ATCOPIA66	LTR/Copia	4.45877	4.59233e-05
AT1TE79810	ATCOPIA15	LTR/Copia	4.31915	0.00922746
AT2TE14650	ATCOPIA53	LTR/Copia	4.19326	0.000627809
AT3TE46730	ATCOPIA6	LTR/Copia	3.82436	0.000413512
AT2TE15150	ATCOPIA49	LTR/Copia	3.81594	0.000659698
AT2TE14280	ATCOPIA5	LTR/Copia	3.60299	0.000154214
AT2TE14310	ATCOPIA56	LTR/Copia	3.50002	0.000756015
AT2TE15045	ATCOPIA11	LTR/Copia	3.22289	9.96183e-05
AT2TE15035	ATCOPIA11	LTR/Copia	3.17591	0.00126862
AT2TE14160	ATCOPIA50	LTR/Copia	3.06822	0.00250839
AT2TE66360	ATCOPIA50	LTR/Copia	2.60757	3.79396e-05
AT2TE59250	ATCOPIA54	LTR/Copia	2.72822	0.000750012
AT2TE14315	ATCOPIA55	LTR/Copia	2.64526	0.0017559
AT2TE15030	ENDOVIR1	LTR/Copia	2.06989	0.000404516
AT2TE14495	ATCOPIA23	LTR/Copia	2.00483	0.00222685
AT5TE40235	ATGP10	LTR/Gypsy	7.81364	9.19568e-06
AT2TE28025	ATGP10	LTR/Gypsy	7.59591	7.74095e-07
AT2TE03625	ATGP10	LTR/Gypsy	6.77063	1.38011e-05
AT4TE16930	ATGP10	LTR/Gypsy	5.8873	0.000557271
AT4TE20385	ATGP10	LTR/Gypsy	5.83519	3.56715e-05
AT2TE16080	ATGP10	LTR/Gypsy	5.723	0.000129733
AT1TE45390	ATGP10	LTR/Gypsy	5.56852	4.34314e-05
AT4TE15835	ATGP10	LTR/Gypsy	5.31825	7.66466e-05
AT4TE15825	ATGP10	LTR/Gypsy	5.0638	3.11091e-05
AT4TE15555	ATGP10	LTR/Gypsy	4.266	0.000817859
AT3TE57160	ATGP10	LTR/Gypsy	4.22874	2.93618e-05
AT3TE57100	ATGP10	LTR/Gypsy	3.94179	5.18011e-06
AT4TE09570	ATGP10	LTR/Gypsy	3.69162	0.000823376
AT4TE16940	ATGP10	LTR/Gypsy	3.67345	0.00151347
AT5TE39850	ATGP10	LTR/Gypsy	3.56288	6.36603e-05
AT1TE47300	ATGP10	LTR/Gypsy	3.49958	8.76734e-05
AT3TE60430	ATGP10	LTR/Gypsy	3.44149	0.000355375
AT2TE19610	ATGP10	LTR/Gypsy	3.27958	7.28917e-05
AT4TE15525	ATGP10	LTR/Gypsy	2.83114	1.35686e-05
AT4TE19080	ATGP10	LTR/Gypsy	2.57789	0.00246011
AT2TE12340	ATGP10	LTR/Gypsy	2.41165	0.00653695
AT5TE46265	ATGP10	LTR/Gypsy	2.36111	2.02515e-06
AT4TE16925	ATGP10	LTR/Gypsy	2.05879	0.000572754
AT2TE00015	ATGP2	LTR/Gypsy	4.1768	2.74419e-07
AT2TE13955	ATGP2	LTR/Gypsy	3.91694	4.99476e-07
AT3TE61295	ATGP2	LTR/Gypsy	3.72247	6.76385e-05
AT2TE11540	ATGP2	LTR/Gypsy	3.56481	8.7672e-07
AT3TE47595	ATGP2	LTR/Gypsy	3.55421	4.46498e-05
AT5TE40350	ATGP2	LTR/Gypsy	3.49821	1.83548e-06
AT5TE41105	ATGP2	LTR/Gypsy	3.02978	2.268e-06
AT3TE61305	ATGP2	LTR/Gypsy	3.01945	0.00054379
AT4TE15590	ATGP2	LTR/Gypsy	2.80878	0.00025304
AT4TE08980	ATGP2	LTR/Gypsy	2.79442	0.00044267
AT3TE50130	ATGP2	LTR/Gypsy	2.78626	6.40053e-06
AT5TE45130	ATGP2	LTR/Gypsy	2.69057	0.00146551
AT2TE21610	ATGP2	LTR/Gypsy	2.32826	0.000540884
AT4TE18055	ATHILA2	LTR/Gypsy	4.01662	0.000114105
AT2TE16880	ATHILA2	LTR/Gypsy	2.97789	0.00169368
AT5TE41330	ATHILA2	LTR/Gypsy	2.92673	4.43778e-05
AT3TE59095	ATHILA2	LTR/Gypsy	2.84907	1.22664e-05
AT1TE47545	ATHILA2	LTR/Gypsy	2.70328	0.000445609
AT4TE13295	ATHILA2	LTR/Gypsy	2.46275	9.25883e-06
AT1TE44905	ATHILA2	LTR/Gypsy	2.39211	6.41278e-05
AT2TE11765	ATHILA2	LTR/Gypsy	2.39192	0.00015766
AT4TE14995	ATHILA2	LTR/Gypsy	2.30166	5.70252e-05
AT1TE45710	ATHILA2	LTR/Gypsy	2.26593	0.000191511
AT5TE44070	ATHILA2	LTR/Gypsy	2.25731	7.17531e-06
AT1TE51655	ATHILA2	LTR/Gypsy	2.21576	0.00128117
AT2TE17940	ATHILA2	LTR/Gypsy	2.19854	8.08288e-05
AT1TE47725	ATHILA2	LTR/Gypsy	2.1454	0.00240052
AT1TE49325	ATHILA2	LTR/Gypsy	2.06262	8.65839e-05
AT2TE14330	ATHILA7	LTR/Gypsy	3.60585	0.000159932
AT2TE14320	ATHILA7	LTR/Gypsy	2.71042	6.48789e-05
AT4TE71510	ATGP8	LTR/Gypsy	3.43796	6.5891e-05
AT4TE15820	ATLANTYS2	LTR/Gypsy	3.1016	6.06598e-07
AT4TE08985	ATGP2N	LTR/Gypsy	2.8223	0.000668045
AT1TE50170	ATGP2N	LTR/Gypsy	2.15669	0.000792906
AT1TE46775	ATHILA6B	LTR/Gypsy	2.52848	1.71147e-05
AT1TE51005	ATHILA6B	LTR/Gypsy	2.2547	0.000126485
AT4TE74240	ATGP9B	LTR/Gypsy	2.35466	8.86637e-05
AT2TE14255	ATGP5	LTR/Gypsy	2.14171	5.62219e-05
AT5TE40230	ATDNA12T3A	DNA	7.06063	3.60655e-06
AT1TE45375	ATENSPM3	DNA/En-Spm	6.27191	3.95185e-06
AT1TE45380	ATENSPM7	DNA/En-Spm	6.07603	2.4619e-05
AT4TE09565	ATENSPM2	DNA/En-Spm	2.82482	5.42896e-05
AT5TE35950	HELITRONY1D	RC/Helitron	5.82762	1.85826e-05
AT2TE08075	ATREP4	RC/Helitron	3.07902	0.00124118
AT2TE07240	ATREP4	RC/Helitron	2.786	0.000502602
AT3TE72890	ATREP4	RC/Helitron	2.07799	0.000127464
AT2TE17500	ATREP4	RC/Helitron	2.0714	0.00276238
AT2TE03635	HELITRON5	RC/Helitron	2.68904	7.15783e-06
AT1TE02275	HELITRONY3	RC/Helitron	2.54019	0.00894932
AT3TE51880	ATREP10D	RC/Helitron	2.33476	8.92408e-05
AT1TE30180	ATREP10B	RC/Helitron	2.16272	4.59547e-05
AT4TE09335	RathE1_cons	RathE1_cons	5.72555	3.80174e-05
AT5TE35940	TA11	LINE/L1	4.48817	1.49182e-05
AT2TE15160	TA11	LINE/L1	2.29026	0.000456124
AT2TE14150	ATLINEIII	LINE/L1	3.95795	9.58681e-05
AT4TE17915	ATLINEIII	LINE/L1	3.92902	0.00013958
AT5TE35930	ATLINE1_4	LINE/L1	3.03776	0.000274592
AT1TE70690	ATLINE2	LINE/L1	2.90937	0.000704855
AT2TE14555	ATLINE1_6	LINE/L1	2.77838	0.000310995
AT1TE66985	ATSINE2A	SINE	2.48008	0.00723731
AT5TE58295	TSCL	LINE?	2.34835	0.00124784
AT2TE28020	ATMU1	DNA/MuDR	2.01704	0.00936365
TE ID	Alias	Super Family	ITS+2d vs CTS+2d (log2)	p value ITS+2d vs CTS+2d
AT1TE10935	ATCOPIA78	LTR/Copia	8.28243	1.91526e-05
AT1TE12295	ATCOPIA78	LTR/Copia	8.06801	1.96948e-07
AT3TE54550	ATCOPIA78	LTR/Copia	6.39351	4.40773e-07
AT3TE59075	ATCOPIA78	LTR/Copia	2.54367	0.00314703
AT3TE59080	ATCOPIA78	LTR/Copia	6.79994	5.02083e-05
AT4TE42010	ATCOPIA78	LTR/Copia	5.14806	0.000175272
