# Supplementary material for: Stress-Induced Activation of Heterochromatic Transcription
Source: PLoS Genet. 2010 Oct 28;6(10):e1001175. doi: 10.1371/journal.pgen.1001175 (PMC2965753; doi:10.1371/journal.pgen.1001175)
Supplement: Table S5 — List of transposable elements significantly downregulated (greater than fourfold, P<0.01) in ITS versus CTS. (0.04 MB XLS) [file pgen.1001175.s009.xls]

## Sheet: Feuil1
Table S5.
TE ID	Alias	Super Family	ITS vs CTS (log2)	p value ITS vs CTS
AT1TE53070	ATCOPIA87	LTR/Copia	-2.01333	0.00264079
AT3TE00350	ATCOPIA24	LTR/Copia	-2.12908	0.00144389
AT1TE15890	ATCOPIA68	LTR/Copia	-2.34329	0.00845153
AT4TE31690	ATCOPIA56	LTR/Copia	-2.51468	3.20032e-05
AT3TE37080	META1	LTR/Copia	-2.61681	0.00344563
AT4TE10320	ATCOPIA93	LTR/Copia	-2.61766	2.02868e-05
AT2TE41455	ATCOPIA46	LTR/Copia	-2.73658	0.000205749
AT3TE68910	ATCOPIA35	LTR/Copia	-2.82096	0.00121998
AT3TE89880	ATCOPIA41	LTR/Copia	-3.55539	0.000811891
AT2TE50950	ATCOPIA50	LTR/Copia	-3.76734	0.00036248
AT1TE35415	SADHU	null	-2.02778	0.000159322
AT1TE02770	SADHU	null	-4.39476	7.96492e-06
AT5TE49795	ATIS112A	DNA/Harbinger	-2.05222	0.00327894
AT5TE59570	ATIS112A	DNA/Harbinger	-2.37584	7.24432e-06
AT5TE59580	ATIS112A	DNA/Harbinger	-2.53653	0.00078044
AT4TE09845	ATIS112A	DNA/Harbinger	-3.38082	0.000460095
AT5TE24155	ATSINE2A	SINE	-2.06661	0.00742475
AT5TE22900	ATSINE2A	SINE	-2.27303	0.00275608
AT1TE57925	ATSINE2A	SINE	-3.33743	0.000183301
AT5TE55245	ATREP3	RC/Helitron	-2.06996	0.00607503
AT1TE41000	HELITRON1	RC/Helitron	-2.121	0.000277828
AT1TE59175	ATREP15	RC/Helitron	-2.28392	0.000475744
AT1TE55960	ATREP15	RC/Helitron	-4.1145	6.15981e-06
AT1TE17410	ATREP5	RC/Helitron	-2.34036	0.00423216
AT4TE29780	ATREP5	RC/Helitron	-3.74465	0.000211636
AT1TE07165	ATREP10D	RC/Helitron	-2.41377	0.00304896
AT3TE43435	ATREP4	RC/Helitron	-2.66676	0.000190788
AT2TE30930	HELITRONY1A	RC/Helitron	-2.67997	0.00308328
AT2TE44940	ATREP6	RC/Helitron	-3.67546	0.000142112
AT5TE47610	ATREP6	RC/Helitron	-6.46122	2.71878e-05
AT1TE58840	ATDNA1T9A	DNA/MuDR	-2.08309	1.23691e-06
AT5TE62660	VANDAL17	DNA/MuDR	-2.21084	0.000224594
AT3TE40935	VANDAL17	DNA/MuDR	-2.33346	5.53158e-05
AT3TE25340	VANDAL17	DNA/MuDR	-2.59127	0.000385389
AT2TE86520	ATDNAI27T9A	DNA/MuDR	-2.22312	0.000109884
AT3TE05950	ATMU6N1	DNA/MuDR	-2.26232	1.44735e-05
AT1TE67360	ATMU6N1	DNA/MuDR	-2.31476	3.21795e-05
AT1TE20840	ATMU6N1	DNA/MuDR	-2.61869	0.000310632
AT4TE46265	ATDNAI27T9C	DNA/MuDR	-2.55115	0.000657539
AT1TE79760	ATDNAI27T9C	DNA/MuDR	-4.60918	0.000248858
AT5TE04700	LIMPET1	DNA/MuDR	-2.70586	0.000558812
AT2TE27705	VANDAL2N1	DNA/MuDR	-2.84392	0.00852879
AT1TE13245	VANDAL1	DNA/MuDR	-2.91336	0.000634696
AT5TE17230	BRODYAGA1	DNA/MuDR	-3.44232	0.00356053
AT5TE18975	VANDAL8	DNA/MuDR	-3.58386	0.000754113
AT5TE37605	VANDAL6	DNA/MuDR	-3.67098	6.60789e-05
AT3TE58855	ATHAT3	DNA/HAT	-2.13683	0.000402394
AT4TE33435	ATHAT3	DNA/HAT	-2.60566	9.16692e-05
AT1TE98130	TAG1	DNA/HAT	-3.08181	9.91598e-06
AT1TE15370	DRL1	DNA/HAT	-3.68491	1.57194e-05
AT1TE04990	ATHAT10	DNA/HAT	-5.71196	0.000845635
AT4TE52725	ATENSPM6	DNA/En-Spm	-2.1805	0.000315123
AT2TE79400	ATENSPM6	DNA/En-Spm	-2.51317	0.00197661
AT5TE09070	ATENSPM6	DNA/En-Spm	-2.83657	0.000670603
AT3TE21410	ATENSPM6	DNA/En-Spm	-2.88352	5.99847e-05
AT3TE25930	ATENSPM5	DNA/En-Spm	-2.51106	5.9176e-05
AT5TE64925	ATENSPM1A	DNA/En-Spm	-2.54135	1.38905e-05
AT2TE32080	ATENSPM1A	DNA/En-Spm	-3.34899	5.83246e-05
AT4TE85370	ATLINE1_6	LINE/L1	-2.26878	0.00742023
AT4TE25335	ATLINE1_6	LINE/L1	-2.55751	0.00315743
AT2TE15350	ATLINE1A	LINE/L1	-2.50427	0.000474185
AT3TE45230	ATLINE1A	LINE/L1	-3.12015	0.00159855
AT2TE26660	ATLINE1_1	LINE/L1	-3.55274	0.000876296
AT4TE10620	RathE1_cons	RathE1_cons	-2.33472	0.000283825
AT3TE32730	ATGP1	LTR/Gypsy	-2.36836	0.00164803
AT5TE11920	ATGP1	LTR/Gypsy	-3.24692	3.13413e-05
AT2TE45520	ATHILA6A	LTR/Gypsy	-2.52129	0.000294424
AT4TE22225	ATHILA6A	LTR/Gypsy	-2.52206	0.00882426
AT5TE47605	ATHILA6A	LTR/Gypsy	-3.81741	0.000400258
AT5TE71590	ATHILA6A	LTR/Gypsy	-4.03129	0.00176523
AT4TE22170	ATHILA6A	LTR/Gypsy	-4.3551	0.00201457
AT3TE44620	ATGP3	LTR/Gypsy	-4.11522	0.000437535
